# Supplementary material for: Exploring the reactivity of white phosphorus with electrophilic carbenes: synthesis of a P4 cage and P8 clusters
Source: Royal Society of Chemistry journal article supplement (doi:10.1039/c3cc42041h), 2013-01-01
Supplement: c3cc42041h.pdf [file c3cc42041h.pdf]

# Supporting Information for:

## “Exploring the reactivity of white phosphorus with electrophilic carbenes: synthesis of a P<sub>4</sub> cage and P<sub>8</sub> clusters”

Caleb D. Martin,<sup>a</sup> Cory M. Weinstein,<sup>a</sup> Curtis E. Moore,<sup>b</sup> Arnold L. Rheingold,<sup>b</sup> and Guy  
Bertrand<sup>\*a</sup>

<sup>a</sup>Joint CNRS-UCSD Research Laboratory (UMI 3555), Department of Chemistry and  
Biochemistry, University of California, San Diego, 9500 Gilman Drive, La Jolla,  
California 92093-0358

<sup>b</sup> X-ray Crystallography Facility UCSD

[guybertrand@ucsd.edu](mailto:guybertrand@ucsd.edu)

### Table of Contents

|                                                                                                                     |    |
|---------------------------------------------------------------------------------------------------------------------|----|
| Experimental                                                                                                        | 2  |
| Figure S-1: Crude <sup>31</sup> P{ <sup>1</sup> H} NMR spectrum for the reaction of <b>1f</b> with P <sub>4</sub> . | 5  |
| Figure S-2: <sup>31</sup> P{ <sup>1</sup> H} NMR spectrum of <b>2</b> .                                             | 6  |
| Figure S-3: <sup>31</sup> P{ <sup>1</sup> H} NMR spectrum of <b>3</b> .                                             | 7  |
| Figure S-4: <sup>31</sup> P{ <sup>1</sup> H} NMR spectrum of <b>4</b> .                                             | 8  |
| Table S-1: X-ray details for <b>2-4</b> .                                                                           | 9  |
| References:                                                                                                         | 10 |

### General Considerations:

All manipulations were performed under an inert atmosphere in an argon filled MBraun glove box or using standard Schlenk techniques. The carbenes **1c**, **1f** and **1g** were prepared via the literature procedures.<sup>1-3</sup> White phosphorus was sublimed and stored under argon in the dark. Toluene, benzene and hexane were freshly distilled over sodium metal. CDCl<sub>3</sub> used for <sup>1</sup>H NMR spectroscopy was purchased from Cambridge Isotope Laboratories and dried over CaH<sub>2</sub>. Multinuclear NMR data are listed in ppm, relative to Me<sub>4</sub>Si (<sup>13</sup>C and <sup>1</sup>H) and H<sub>3</sub>PO<sub>4</sub> (<sup>31</sup>P), coupling constants are in Hertz and all NMR spectra were recorded on a Varian VX 500 MHz or JEOL 500 MHz spectrometer. Single crystal X-ray diffraction data were collected on a Bruker Apex II-CCD detector using Mo-K<sub>α</sub> radiation (λ = 0.71073 Å). Crystals were selected under oil, mounted on nylon loops then immediately placed in a cold stream of N<sub>2</sub>. Structures were solved and refined using SHELXTL. Melting points were measured with a Büchi melting point apparatus.

CAUTION: P<sub>4</sub> is extremely pyrophoric and the proper safety procedures should be followed when handling.

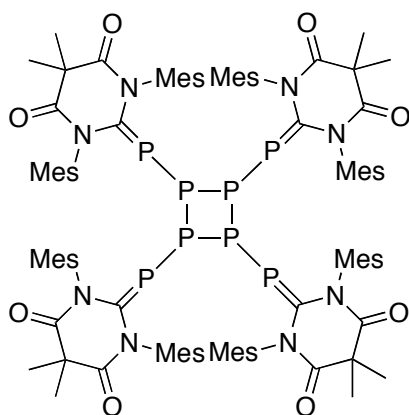

**2:** A solution of **1f** in benzene (0.500 g, 1.33 mmol; 40 mL) was cannula transferred dropwise to a solution of P<sub>4</sub> in toluene (0.330 g, 2.66 mmol; 20 mL) in the dark. The colorless solution immediately began acquiring an orange color, which then became red. After stirring for 2 hours, the solvent was removed *in vacuo*. The solids were washed with benzene (10 mL), then hexanes (2 × 15 mL) and dried *in vacuo* to give

a red powder. Yield: 0.582 g, 66%; Single crystals of **2** for X-ray diffraction studies were grown by slow evaporation of a benzene solution. m.p. 160-162°C;  $^{31}\text{P}\{^1\text{H}\}$  ( $\text{CDCl}_3$ )  $\delta$  = 107.9 (4P, m), -37.9 (4P, m); ESI-MS  $m/z$   $\text{C}_{96}\text{H}_{112}\text{O}_8\text{N}_8\text{P}_8\text{Na}$  [ $\text{MNa}^+$ ] Calc: 1775.6373 Found: 1775.6396.

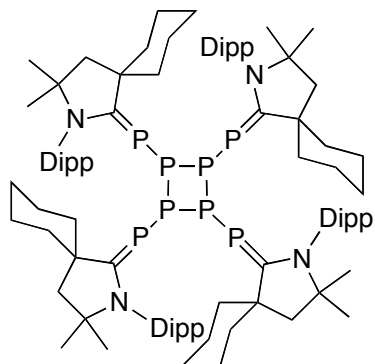

**3**: A solution of **1c** in benzene (0.500 g, 1.54 mmol; 40 mL) was cannula transferred dropwise to a solution of  $\text{P}_4$  (0.382 g, 3.08 mmol; 25 mL) in toluene in the dark. The colorless solution immediately began acquiring a green color, which then became red. After stirring for 2 hours, the toluene was removed *in vacuo* to produce an orange powder. The product was extracted with THF and the solvent removed *in vacuo*. The solids were washed with cold pentane ( $2 \times 15$  mL) and dried *in vacuo* to give an orange powder. Yield 0.351 g, 40%; Single crystals of **3** for X-ray diffraction studies were grown by vapor diffusion of hexane into a saturated benzene solution. m.p. 204-206°C;  $^1\text{H}$  NMR ( $\text{CDCl}_3$ )  $\delta$  = 7.28 (4H, t,  $^3J = 7.5$  Hz), 7.14 (8H, d,  $^3J = 7.5$  Hz), 3.03-2.90 (8H, m), 2.80 (16H, sept,  $^3J = 7.0$  Hz), 2.01 (8H, s), 1.55-1.35 (32H, m), 1.29 (24H, d,  $^3J = 7.0$  Hz), 1.27-1.13 (8H, m), 1.18 (24H, d,  $^3J = 7.0$  Hz);  $^{13}\text{C}\{^1\text{H}\}$  ( $\text{CDCl}_3$ )  $\delta$  = 212.3 (br d,  $J = 84$  Hz), 148.1 (d,  $J = 3$  Hz), 134.6 (d,  $J = 3$  Hz), 128.3, 124.9, 68.2 (d,  $J = 1$  Hz), 56.1 (d,  $J = 11$  Hz), 50.5, 29.7, 29.0, 27.7, 27.6, 25.1, 24.5, 23.5;  $^{31}\text{P}\{^1\text{H}\}$  ( $\text{CDCl}_3$ )  $\delta$  = 66.4 (4P, m), -44.5 (4P, m); HRMS  $m/z$  calc 1549.9052, found 1549.9033 [ $\text{MH}^+$ ].

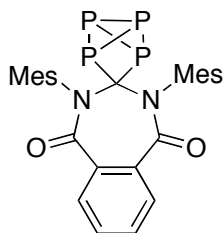

**4**: Carbene **1g** (0.090 g, 0.220 mmol) was added to an NMR tube with  $P_4$  (0.027 g, 0.220 mmol).  $C_6D_6$  was then added to the mixture of solids. Upon dissolving of the solids, the solution turned a red-orange color and over time a yellow precipitate formed which was primarily **4** (See Fig S-4 for  $^{31}P\{^1H\}$  NMR spectrum). Although we could not obtain a pure bulk sample, the reaction proceeded in >50% yield. Single crystals of **4** for X-ray diffraction studies were grown by vapor diffusion of hexane into a saturated  $CDCl_3$  solution.  $^{31}P\{^1H\}$  ( $CDCl_3$ )  $\delta$  = -10.5 (1P, td,  $^1J_{P-P}$  = 85 Hz and  $^2J_{P-P}$  19 Hz), -14.5 (1P, td,  $^1J_{P-P}$  = 85 Hz and  $^2J_{P-P}$  19 Hz), -326 (2P, dd,  $^1J_{P-P}$  = 89 Hz and  $^2J_{P-P}$  85 Hz).

Figure S-1: Crude  $^{31}\text{P}\{^1\text{H}\}$  NMR spectrum for the reaction of **1f** with  $\text{P}_4$ .

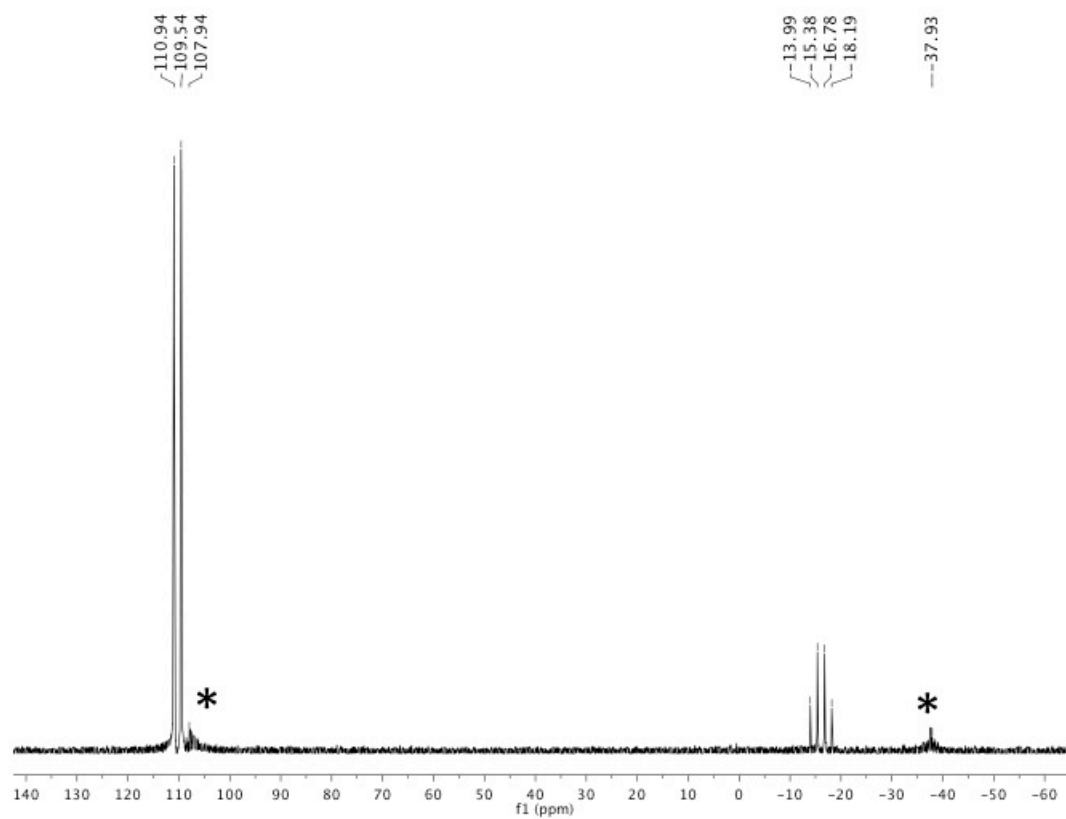

Asterisks denote  $\text{P}_8$  product.

Figure S-2:  $^{31}\text{P}\{^1\text{H}\}$  NMR spectrum of **2**.

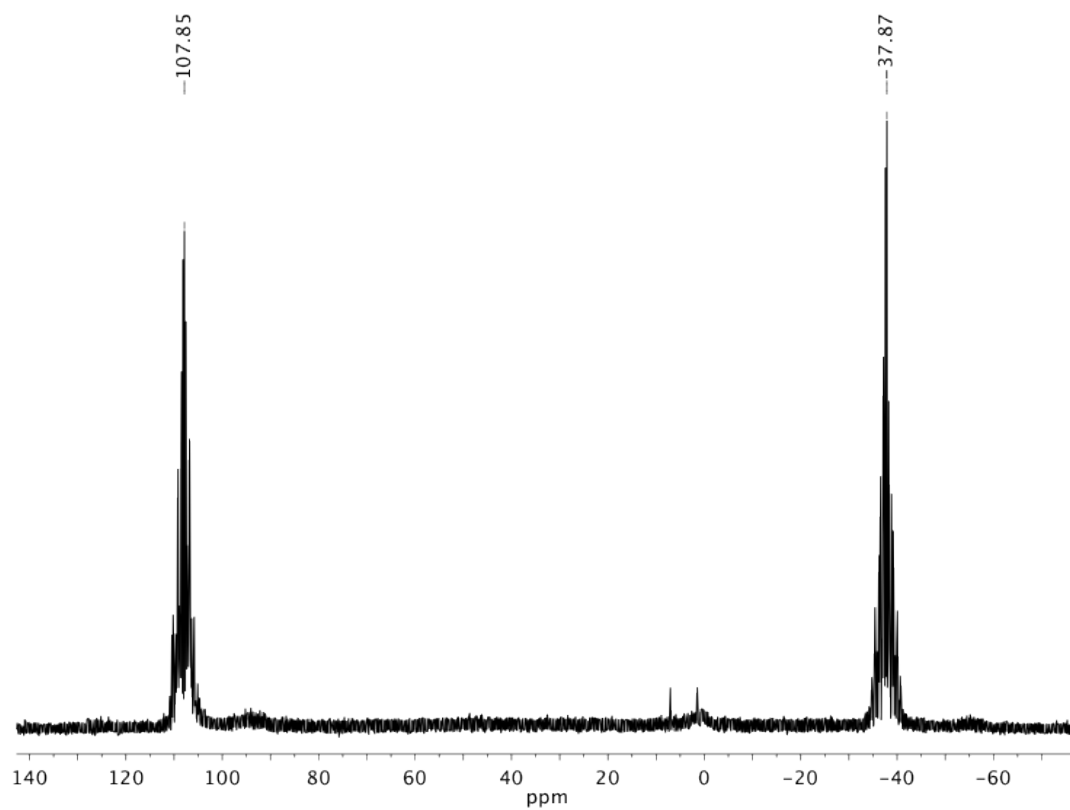

Figure S-3:  $^{31}\text{P}\{^1\text{H}\}$  NMR spectrum of **3**.

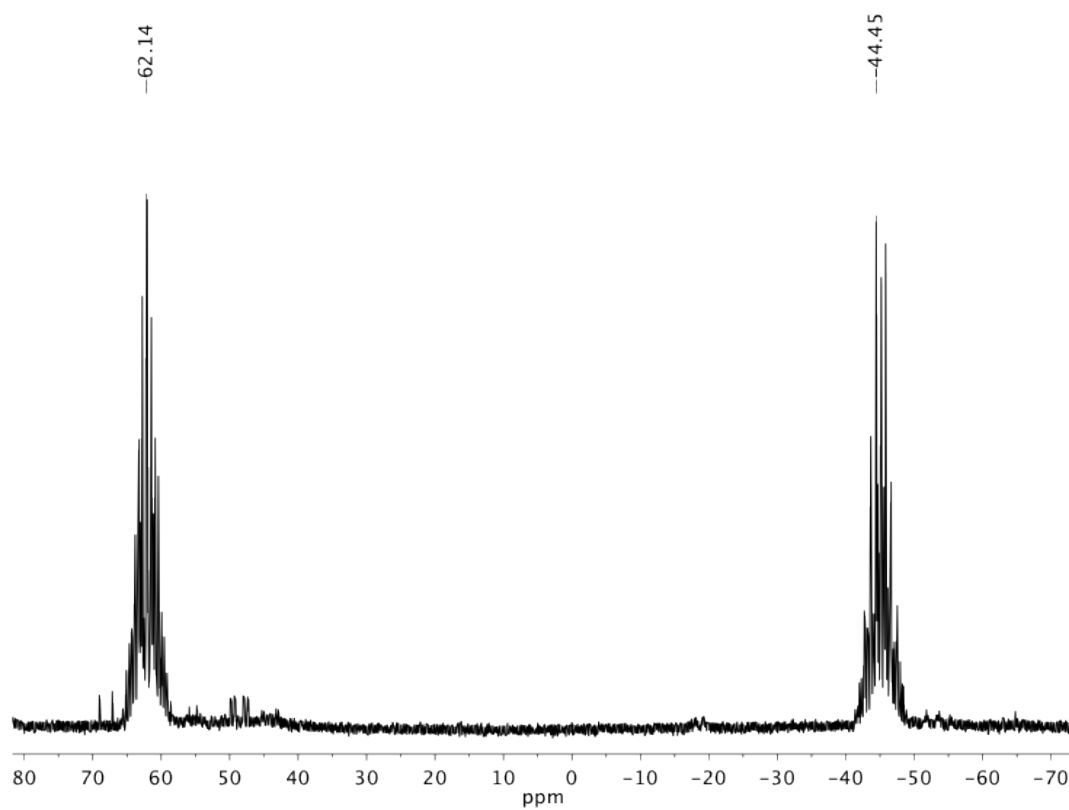

Figure S-4:  $^{31}\text{P}\{^1\text{H}\}$  NMR spectrum of **4**.

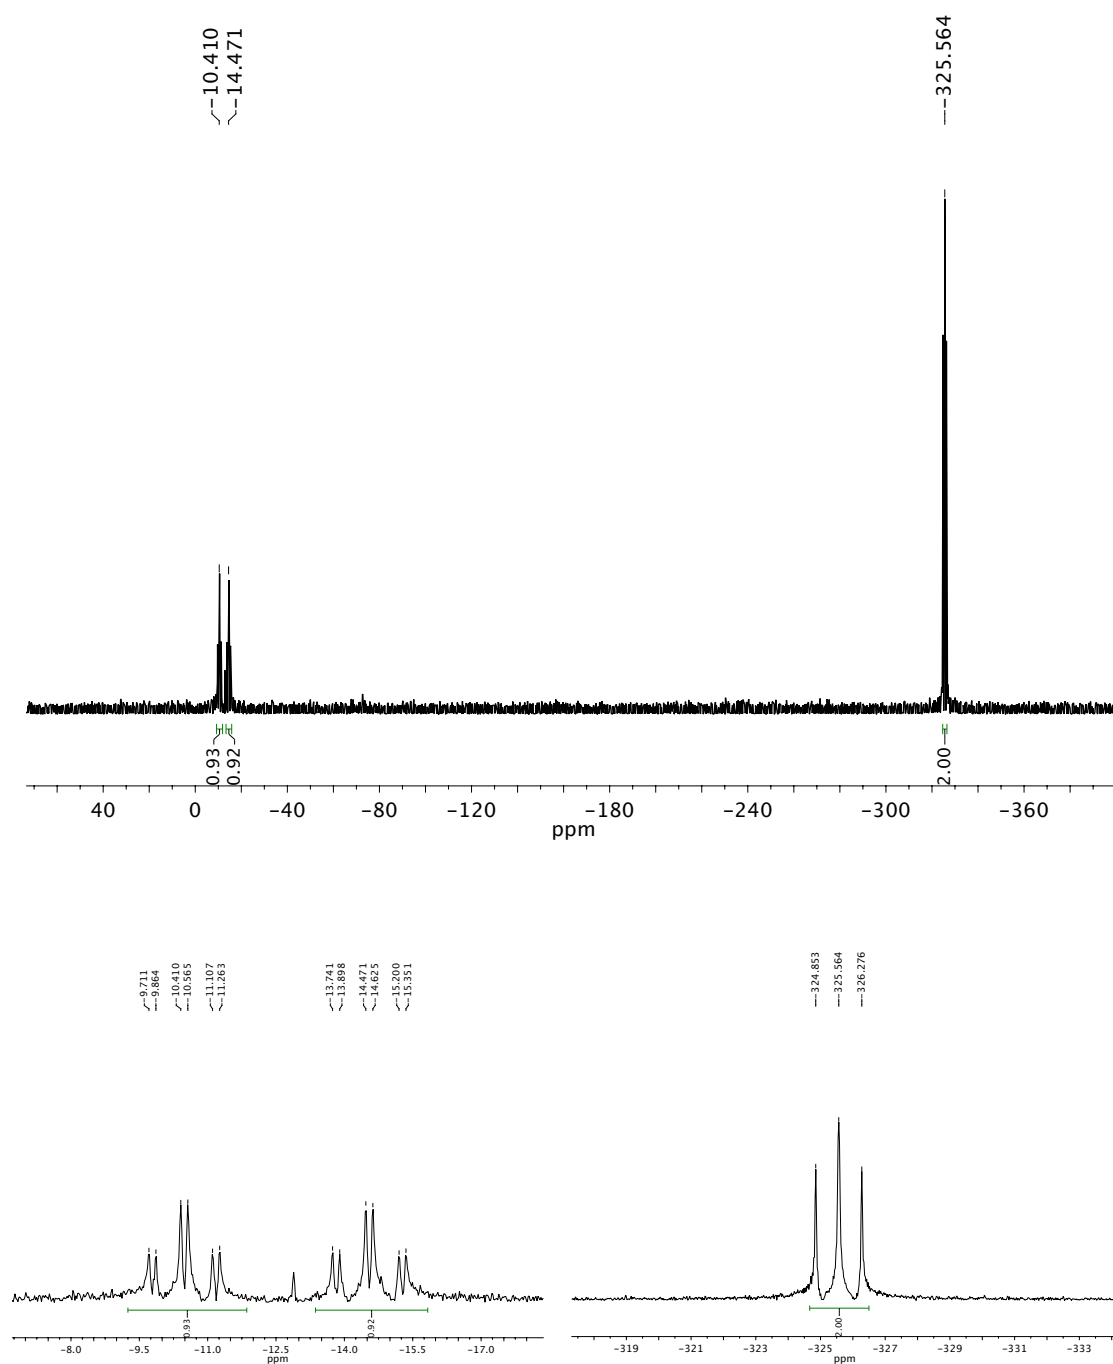



Table S1: X-ray details for **2-4**.

| Compound                                                    | <b>2</b>                                                                       | <b>3</b>                                                       | <b>4</b>                                                                             |
|-------------------------------------------------------------|--------------------------------------------------------------------------------|----------------------------------------------------------------|--------------------------------------------------------------------------------------|
| Empirical formula                                           | C <sub>120</sub> H <sub>136</sub> N <sub>8</sub> O <sub>8</sub> P <sub>8</sub> | C <sub>98</sub> H <sub>146</sub> N <sub>4</sub> P <sub>8</sub> | C <sub>27.33</sub> H <sub>26.33</sub> ClN <sub>2</sub> O <sub>2</sub> P <sub>4</sub> |
| CCDC                                                        | 930071                                                                         | 930072                                                         | 930073                                                                               |
| FW (g/mol)                                                  | 2066.12                                                                        | 1628.0482                                                      | 534.38                                                                               |
| Crystal system                                              | Monoclinic                                                                     | Orthorhombic                                                   | Trigonal                                                                             |
| Space group                                                 | <i>P2/c</i>                                                                    | <i>Fddd</i>                                                    | <i>R-3</i>                                                                           |
| <i>a</i> (Å)                                                | 12.600(4)                                                                      | 12.0923(12)                                                    | 34.4341(10)                                                                          |
| <i>b</i> (Å)                                                | 16.320(5)                                                                      | 29.578(3)                                                      | 34.4341(10)                                                                          |
| <i>c</i> (Å)                                                | 26.808(9)                                                                      | 53.934(5)                                                      | 11.4555(4)                                                                           |
| $\alpha$ (deg)                                              | 90                                                                             | 90                                                             | 90                                                                                   |
| $\beta$ (deg)                                               | 92.213(11)                                                                     | 90                                                             | 90                                                                                   |
| $\gamma$ (deg)                                              | 90                                                                             | 90                                                             | 120                                                                                  |
| <i>V</i> (Å <sup>3</sup> )                                  | 5508(3)                                                                        | 19290(3)                                                       | 11763.1                                                                              |
| <i>Z</i>                                                    | 2                                                                              | 8                                                              | 18                                                                                   |
| <i>D<sub>c</sub></i> (Mg m <sup>-3</sup> )                  | 1.246                                                                          | 1.121                                                          | 1.459                                                                                |
| radiation, $\lambda$ (Å)                                    | .71073                                                                         | .71073                                                         | .71073                                                                               |
| temp (K)                                                    | 100(2)                                                                         | 100(2)                                                         | 100(2)                                                                               |
| <i>R</i> 1[ <i>I</i> >2 $\sigma$ ( <i>I</i> )] <sup>a</sup> | 0.0625                                                                         | 0.0432                                                         | 0.0645                                                                               |
| <i>wR</i> 2( <i>F</i> <sup>2</sup> ) <sup>a</sup>           | 0.1766                                                                         | 0.1067                                                         | 0.1495                                                                               |
| GOF ( <i>S</i> ) <sup>a</sup>                               | 1.009                                                                          | 1.008                                                          | 1.077                                                                                |

<sup>a</sup>  $R1(F[I > 2(I)]) = \sum ||F_o| - |F_c|| / \sum |F_o|$ ;  $wR2(F^2 [all\ data]) = [w(F_o^2 - F_c^2)^2]^{1/2}$ ;  $S(all\ data) = [w(F_o^2 - F_c^2)^2 / (n - p)]^{1/2}$  (*n* = no. of data; *p* = no. of parameters varied;  $w = 1/[^2(F_o^2) + (aP)^2 + bP]$  where  $P = (F_o^2 + 2F_c^2)/3$  and *a* and *b* are constants suggested by the refinement program.

References:

1. T. W. Hudnall, J. P. Moerdyk and C. W. Bielawski, *Chem. Commun.*, 2010, **46**, 4288.
2. R. Jazzar, R. D. Dewhurst, J.-B. Bourg, B. Donnadieu, Y. Canac and G. Bertrand, *Angew. Chem., Int. Ed.*, 2007, **46**, 2899.
3. T. W. Hudnall, A. G. Tennyson and C. W. Bielawski, *Organometallics*, 2010, **29**, 4569.
